# Supplementary material
Source: MDPI journal article supplement (https://www.mdpi.com/2073-4441/13/22/3196)
Supplement: s1 [file s1]

**Table S1.** Overview of statistics in the settlements of Aral Sea region (2005-2015)

[illegible]

|      |              |      |      |     |     |     |      |     |     |     |     |    |    |    |     |
|------|--------------|------|------|-----|-----|-----|------|-----|-----|-----|-----|----|----|----|-----|
| 2008 |              |      |      |     |     |     |      |     |     |     |     |    |    |    | 0   |
|      | Zhaksykylysh | 5273 | 2703 | 921 | 520 | 463 | 2570 | 928 | 167 | 419 | 113 | 38 | 34 | 89 | -55 |
|      | Aral kum     | 1317 | 780  | 358 | 128 | 102 | 537  | 99  | 123 | 117 | 25  | 6  | 5  | 13 | -8  |
|      | Shomish      | 348  | 192  | 88  | 37  | 12  | 156  | 79  | 17  | 30  | 7   | 1  | 5  | 7  | -2  |
|      | Qamystybas   | 1816 | 913  | 336 | 120 | 196 | 903  | 339 | 120 | 208 | 51  | 19 | 12 | 39 | -27 |
|      | Yeskiura     | 215  | 112  | 31  | 26  | 7   | 103  | 25  | 21  | 8   | 4   | 2  | 0  | 1  | -1  |
|      | Raim         | 311  | 155  | 64  | 34  | 13  | 156  | 64  | 27  | 17  | 5   | 2  | 2  | 0  | 2   |
|      | Amanotkel    | 2006 | 948  | 408 | 115 | 135 | 1058 | 295 | 127 | 154 | 45  | 12 | 5  | 27 | -22 |
|      | Shomishkol   | 644  | 310  | 106 | 77  | 17  | 334  | 120 | 81  | 21  | 16  | 1  | 1  | 1  | 0   |
|      | Kyzylzhar    | 1256 | 634  | 178 | 151 | 66  | 622  | 157 | 147 | 80  | 31  | 6  | 8  | 23 | -15 |
|      | Akkulak      | 291  | 126  | 40  | 37  | 9   | 165  | 49  | 45  | 13  | 4   | 1  | 3  | 3  | 0   |
|      | Zhanakurylys | 921  | 469  | 173 | 71  | 51  | 452  | 169 | 59  | 46  | 32  | 7  | 4  | 22 | -18 |
|      | Qarateren    | 156  | 68   | 25  | 69  | 9   | 88   | 42  | 65  | 9   | 41  | 11 | 0  | 7  | -7  |
|      | Bugen        | 979  | 523  | 196 | 141 | 24  | 456  | 174 | 123 | 43  | 30  | 6  | 9  | 11 | -2  |
|      | Qarashalan   | 514  | 267  | 119 | 69  | 12  | 247  | 79  | 72  | 30  | 10  | 4  | 4  | 6  | -2  |
|      | Zhaksykylysh |      |      |     |     |     |      |     |     |     |     |    |    |    |     |
| 2011 |              |      |      |     |     |     |      |     |     |     |     |    |    |    |     |
|      | Zhaksykylysh | 5044 | 2492 | 943 | 565 | 190 | 2552 | 893 | 535 | 263 | 144 | 40 | 45 | 42 | 3   |
|      | Aral kum     | 1193 | 590  | 223 | 134 | 45  | 603  | 211 | 126 | 62  | 35  | 10 | 11 | 10 | 1   |
|      | Shomish      | 397  | 196  | 74  | 44  | 15  | 201  | 70  | 42  | 21  | 12  | 3  | 4  | 3  | 1   |
|      | Qamystybas   | 1807 | 893  | 338 | 202 | 68  | 914  | 320 | 192 | 94  | 52  | 14 | 16 | 15 | 1   |
|      | Yeskiura     | 160  | 79   | 30  | 18  | 6   | 81   | 28  | 17  | 8   | 5   | 1  | 1  | 1  | 0   |
|      | Raim         | 315  | 156  | 59  | 35  | 12  | 159  | 56  | 33  | 16  | 9   | 3  | 3  | 3  | 0   |
|      | Amanotkel    | 2020 | 998  | 378 | 226 | 76  | 1022 | 358 | 214 | 105 | 59  | 16 | 18 | 17 | 1   |
|      | Shomishkol   | 618  | 306  | 116 | 69  | 23  | 312  | 109 | 66  | 32  | 18  | 5  | 6  | 5  | 1   |

|      |              |      |      |      |     |     |      |     |     |     |     |    |     |    |     |
|------|--------------|------|------|------|-----|-----|------|-----|-----|-----|-----|----|-----|----|-----|
|      | Kyzylzhar    | 1200 | 593  | 224  | 134 | 45  | 607  | 212 | 127 | 63  | 35  | 10 | 11  | 10 | 1   |
|      | Akkulak      | 293  | 145  | 55   | 33  | 11  | 148  | 52  | 31  | 15  | 8   | 2  | 3   | 2  | 1   |
|      | Zhanakurylys | 884  | 437  | 165  | 99  | 33  | 447  | 156 | 94  | 46  | 26  | 7  | 8   | 7  | 1   |
|      | Qarateren    | 132  | 66   | 25   | 15  | 5   | 66   | 23  | 14  | 7   | 4   | 1  | 1   | 1  | 0   |
|      | Bugen        | 942  | 466  | 176  | 106 | 36  | 476  | 167 | 100 | 49  | 27  | 8  | 8   | 8  | 0   |
|      | Qarashalan   | 609  | 301  | 114  | 68  | 23  | 308  | 108 | 65  | 32  | 18  | 5  | 5   | 5  | 0   |
|      |              |      |      |      |     |     |      |     |     |     |     |    |     |    |     |
| 2015 |              |      |      |      |     |     |      |     |     |     |     |    |     |    |     |
|      | Zhaksykylysh | 5123 | 2656 | 1010 | 591 | 111 | 2467 | 790 | 639 | 256 | 102 | 20 | 123 | 43 | 162 |
|      | Aral kum     | 1243 | 624  | 149  | 66  | 60  | 619  | 175 | 78  | 56  | 20  | 6  | 0   | 0  | 14  |
|      | Shomish      | 489  | 247  | 89   | 55  | 17  | 242  | 88  | 61  | 13  | 13  | 6  | 0   | 1  | 6   |
|      | Qamystybas   | 1907 | 975  | 270  | 236 | 49  | 932  | 279 | 200 | 77  | 30  |    |     |    | 30  |
|      | Yeskiura     | 166  | 89   | 38   | 23  | 3   | 77   | 22  | 26  | 5   | 3   |    |     |    | 3   |
|      | Raim         | 369  | 164  | 50   | 49  | 7   | 205  | 65  | 47  | 18  | 5   |    |     | 1  | 4   |
|      | Amanotkel    | 2450 | 1151 | 357  | 349 | 110 | 1299 | 383 | 335 | 166 | 52  | 6  |     |    | 46  |
|      | Shomishkol   | 698  | 396  | 198  | 83  | 19  | 302  | 98  | 81  | 24  | 14  | 3  | 4   | 3  | 12  |
|      | Kyzylzhar    | 1099 | 461  | 228  | 98  | 27  | 638  | 232 | 147 | 32  | 18  | 5  | 7   | 3  | 17  |
|      | Akkulak      | 296  | 138  | 47   | 33  | 15  | 158  | 42  | 41  | 24  | 2   | 0  |     |    | 2   |
|      | Zhanakurylys | 903  | 516  | 185  | 123 | 29  | 387  | 138 | 102 | 23  | 17  | 5  | 0   | 0  | 12  |
|      | Qarateren    | 156  | 88   | 22   | 23  | 4   | 68   | 25  | 15  | 4   | 1   |    |     |    | 1   |
|      | Bugen        | 1099 | 562  | 185  | 153 | 39  | 537  | 143 | 130 | 71  | 12  | 4  | 7   | 7  | 8   |
|      | Qarashalan   | 606  | 325  | 141  | 68  | 10  | 281  | 112 | 58  | 29  | 19  | 1  | 6   | 6  | 18  |
